# Supplementary material for: Metagenomic Insights into the Structure of Microbial Communities Involved in Nitrogen Cycling in Two Integrated Multitrophic Aquaculture (IMTA) Ponds
Source: MDPI journal article supplement (doi:10.3390/jmse10020171), 2022-01-27
Supplement: s1 [file s1]

Archive with 4 entries (4 files):
- #-0.  Conflict of Interest.pdf
- #-0. Author statement.pdf
- #-0. Highlights.pdf
- #-3. Supplemental materials.pdf
