# Supplementary material for: Metagenomic Insights into the Structure of Microbial Communities Involved in Nitrogen Cycling in Two Integrated Multitrophic Aquaculture (IMTA) Ponds
Source: MDPI journal article supplement (doi:10.3390/jmse10020171), 2022-01-27
Supplement: s1 [file s1 › #-0. Author statement.pdf]

**Qian Liu** performed the experiments and wrote the manuscript. **Junnan Li** and **Yicheng Xie** performed data curation and formal analysis, **Hongwei Shan** performed writing review, and supervision.
