# Supplementary material for: Metagenomic Insights into the Structure of Microbial Communities Involved in Nitrogen Cycling in Two Integrated Multitrophic Aquaculture (IMTA) Ponds
Source: MDPI journal article supplement (doi:10.3390/jmse10020171), 2022-01-27
Supplement: s1 [file s1 › #-0. Conflict of Interest.pdf]

## **Conflict of Interest**

We declare that we have no financial and personal relationships with other people or organizations that can inappropriately influence our work. There is no professional or other personal interest of any nature or kind in any product, service and/or company that could be construed as influencing the position presented in or the review of the manuscript entitled “Metagenomic insights into the structure of microbial communities involved in nitrogen cycling in two integrated multitrophic aquaculture (IMTA) ponds”.
