# Supplementary material for: Metagenomic Insights into the Structure of Microbial Communities Involved in Nitrogen Cycling in Two Integrated Multitrophic Aquaculture (IMTA) Ponds
Source: MDPI journal article supplement (doi:10.3390/jmse10020171), 2022-01-27
Supplement: s1 [file s1 › #-0. Highlights.pdf]

## Highlights

- The coculture of *Sinonovacula constricta* in shrimp-crab ponds resulted in increased nitrogen cycling in water but decreased nitrogen cycling in sediment.
- The reduced nitrogen flux primarily originated within the sediments of the shrimp IMTA ponds, except for assimilatory nitrate reduction.
- pH and  $\text{NH}_4^+$  played important roles influencing nitrogen cycling by the microbial community and overall nitrogen cycling in the shrimp IMTA ponds.
