# Supplementary material for: Metagenomic Insights into the Structure of Microbial Communities Involved in Nitrogen Cycling in Two Integrated Multitrophic Aquaculture (IMTA) Ponds
Source: MDPI journal article supplement (doi:10.3390/jmse10020171), 2022-01-27
Supplement: s1 [file s1 › #-3. Supplemental materials.pdf]

## Supplementary Material

Title: Metagenomic insights into the structure of microbial communities involved in nitrogen cycling in two integrated multitrophic aquaculture (IMTA) ponds

Authors: Qian Liu, Jun-Nan Li, Hong-Wei Shan\*, Yi-Cheng Xie

*The Key Laboratory of Mariculture (Ocean University of China), Ministry of Education, Qingdao, 266003*

\*Correspondence: Hongwei Shan, The Key Laboratory of Mariculture (Ocean University of China), Ministry of Education, Qingdao, China.

E-mail address: shanhongwei@ouc.edu.cn;

Tel.: +86 532 82031912;

ORCID: <https://orcid.org/0000-0002-7829-1755>.

**Figure S1**

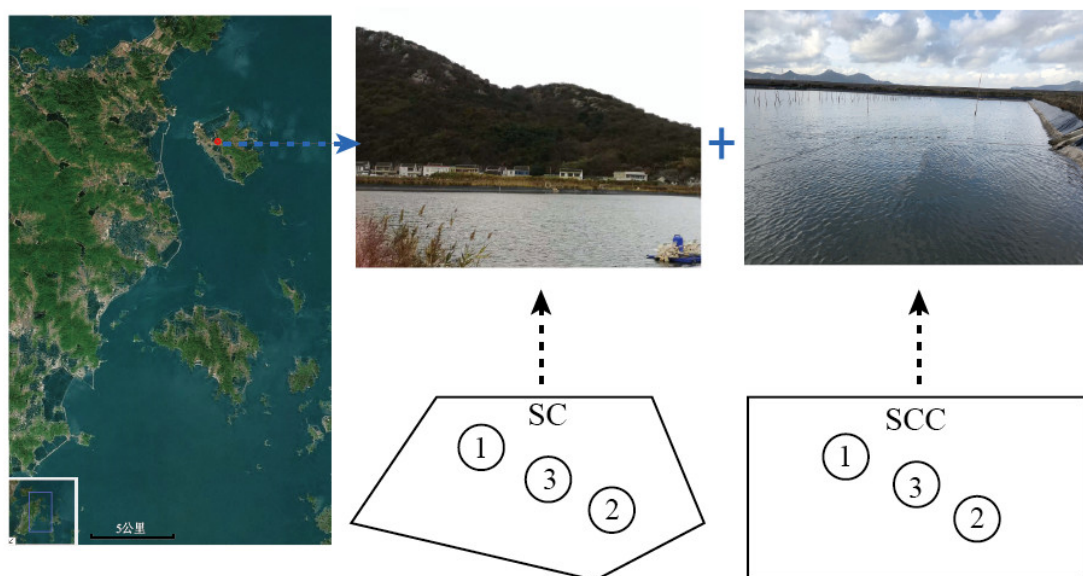

**Table S1** Stocking of cultured organisms under SC and SCC.

| Treatment | Aquaculture species             | Item                          | Period               |
|-----------|---------------------------------|-------------------------------|----------------------|
| SC        | <i>Portunus trituberculatus</i> | Carapace length/ cm           | 0.41±0.02            |
|           |                                 | Carapace width/ cm            | 0.74±0.05            |
|           |                                 | Body weight/ g                | 0.024                |
|           |                                 | Density/ kg•ha <sup>-1</sup>  | 7.5                  |
|           |                                 | Body length/ cm               | 1.02±0.07            |
|           | <i>Penaeus japonicus</i>        | Body weight/ g                | 0.0087               |
|           |                                 | Density/ ind•ha <sup>-1</sup> | 22.5×10 <sup>4</sup> |
|           |                                 | Carapace length/ cm           | 0.41±0.02            |
|           |                                 | Carapace width/ cm            | 0.74±0.05            |
|           |                                 | Body weight/ g                | 0.024                |
| SCC       | <i>P. trituberculatus</i>       | Density/ kg•ha <sup>-1</sup>  | 7.5                  |
|           |                                 | Body length/ cm               | 1.02±0.07            |
|           |                                 | Body weight/ g                | 0.0087               |
|           |                                 | Density/ ind•ha <sup>-1</sup> | 22.5×10 <sup>4</sup> |
|           |                                 | Shell length/ cm              | 1.85±0.14            |
|           | <i>Sinonovacula constricta</i>  | Shell width/ cm               | 0.57±0.10            |
|           |                                 | Body weight/ g                | 0.32±0.02            |
|           |                                 | Density/ kg•ha <sup>-1</sup>  | 37.5                 |
|           |                                 |                               |                      |
|           |                                 |                               |                      |

**Table S2** PCR parameters.

| Reagent               | Volume |
|-----------------------|--------|
| 5×FastPfu Buffer      | 4 µL   |
| 2.5 mmol/L dNTPs      | 2 µL   |
| Forward Primer (5 µM) | 0.8 µL |
| Reverse Primer (5 µM) | 0.8 µL |
| FastPfu Polymerase    | 0.4 µL |
| BSA                   | 0.2 µL |
| Template DNA          | 10 ng  |
| ddH <sub>2</sub> O    | 20 µL  |

**Table S3** PCR system.

| Stage | Reaction                                          |
|-------|---------------------------------------------------|
| 1     | 1× (3 minutes at 95°C)                            |
| 2     | 27×30 sec at 95°C; 30 sec at 55°C; 45 sec at 72°C |
| 3     | 10 minutes at 72°C, 4°C until halted by user      |

**Table S4** Environmental factors in water from SC and SCC.

| Group | Sample sites | T (°C) | pH   | DO (mg/L) | Salinity | TN (mg/L) | TP (mg/L) | NH <sub>4</sub> <sup>+</sup> (mg/L) | NO <sub>2</sub> <sup>-</sup> (mg/L) | NO <sub>3</sub> <sup>-</sup> (mg/L) | PO <sub>4</sub> <sup>3-</sup> (ug/L) | Density (kg/ha) |
|-------|--------------|--------|------|-----------|----------|-----------|-----------|-------------------------------------|-------------------------------------|-------------------------------------|--------------------------------------|-----------------|
| SC    | SC1          | 33.4   | 9.74 | 7.732     | 16.3     | 3.82      | 0.35      | 0.457                               | 0.019                               | 0.863                               | 0.046                                | 0               |
|       | SC2          | 32.6   | 9.69 | 10.427    | 16.6     | 3.78      | 0.29      | 0.477                               | 0.008                               | 1.094                               | 0.031                                | 0               |
|       | SC3          | 31.9   | 9.72 | 8.938     | 16.7     | 4.38      | 0.27      | 0.344                               | 0.010                               | 0.632                               | 0.017                                | 0               |
| SCC   | SCC1         | 34.0   | 9.94 | 8.867     | 16.8     | 3.18      | 0.30      | 0.312                               | 0.015                               | 0.442                               | 0.029                                | 37.5            |
|       | SCC2         | 32.6   | 9.84 | 8.583     | 17.2     | 3.02      | 0.22      | 0.364                               | 0.013                               | 0.531                               | 0.025                                | 37.5            |
|       | SCC3         | 32.7   | 9.94 | 8.086     | 17.1     | 3.05      | 0.30      | 0.381                               | 0.015                               | 0.447                               | 0.024                                | 37.5            |

**Table S5** Environmental factors in sediment from SC and SCC.

| Group | Sample sites | T (°C) | pH   | ORP (mV) | TC (mg/g) | TN (mg/g) | P_NH <sub>4</sub> <sup>+</sup> (mg/L) | P_NO <sub>2</sub> <sup>-</sup> (mg/L) | C: N  | NH <sub>4</sub> <sup>+</sup> (mg/kg) | NO <sub>2</sub> <sup>-</sup> (mg/kg) | Density (kg/ha) |
|-------|--------------|--------|------|----------|-----------|-----------|---------------------------------------|---------------------------------------|-------|--------------------------------------|--------------------------------------|-----------------|
| SC    | SC1          | 30.2   | 7.55 | -171     | 0.1045    | 0.01015   | 2.50                                  | 0.0005                                | 10.29 | 4.35                                 | 0.0119                               | 0               |
|       | SC2          | 29.8   | 7.51 | -166     | 0.0709    | 0.00793   | 2.05                                  | 0.0266                                | 8.94  | 3.10                                 | 0.0360                               | 0               |
|       | SC3          | 30.4   | 7.54 | -183     | 0.1744    | 0.00887   | 1.46                                  | 0.0016                                | 19.67 | 2.63                                 | 0.0093                               | 0               |
| SCC   | SCC1         | 29.9   | 7.62 | -167     | 0.1104    | 0.00825   | 4.45                                  | 0.0017                                | 13.38 | 6.05                                 | 0.0111                               | 37.5            |
|       | SCC2         | 30.1   | 7.64 | -173     | 0.0950    | 0.00852   | 2.11                                  | 0.0017                                | 11.14 | 3.73                                 | 0.0111                               | 37.5            |
|       | SCC3         | 30.3   | 7.61 | -170     | 0.0958    | 0.00907   | 2.17                                  | 0.0014                                | 10.57 | 3.44                                 | 0.0108                               | 37.5            |
